# Supplementary material for: A hierarchical supra-nanostructure of HKUST-1 featuring enhanced H2 adsorption enthalpy and higher mesoporosity
Source: Royal Society of Chemistry journal article supplement (doi:10.1039/c1ce05124e), 2011-01-01
Supplement: c1ce05124e.pdf [file c1ce05124e.pdf]

Electronic Supporting Information for

# A Hierarchical Supra-nanostructure of HKUST-1 Featuring Enhanced H<sub>2</sub> Adsorption Enthalpy and Higher Mesoporosity

Haiqiang Du, Junfeng Bai,\* Congyu Zuo, Zhifeng Xin, Jinbo Hu

State Key Laboratory of Coordination Chemistry, Nanjing National Laboratory of Microstructures,  
School of Chemistry and Chemical Engineering, Nanjing University, Nanjing, P. R. China  
Email address: bjunfeng@nju.edu.cn

## Experimental Sections

### Preparations

All the reagents and solvents were commercially available and used as received. A hierarchical supra-nanostructure of HKUST-1 was prepared by the following process. A solution of H<sub>3</sub>BTC (0.210g, 1.0mmol) in 10mL of ethanol was quickly poured into a solution of Cu(OAc)<sub>2</sub>·H<sub>2</sub>O (0.300g, 1.5mmol) in a bimodal solvents (H<sub>2</sub>O, 10ml and acetic acid, 1mL) under vigorous stirring at room temperature, instantaneously a turquoise suspension developed. Further stirring one hour, the product was collected by centrifugation from the reaction mixture, rinsed with ethanol several times via successive centrifugation-redispersion cycles, and followed by rinsing with fresh acetone several times, and finally desiccated at 80 °C for 4 hours.

### Measurements

The wide-angle powder x-ray diffraction (PXRD) measurement in the 2θ range of 5-50° was recorded on a Bruker axS D8 Advance 40kV, 40mA for CuKα (θ = 1.5418 Å) with a scan rate of 0.2 s/deg at room temperature. Simulation of the PXRD pattern was obtained by the single-crystal data and diffraction-crystal module of the *Mercury* program.

The morphology of the product was performed by FE-SEM using Hitachi S4800 operating at 10kV, TEM and HR-TEM images were performed with JEOL JEM-2100 at an accelerating voltage of 200kV.

Gas sorption isotherms of product. N<sub>2</sub> (77K) and H<sub>2</sub> (77 and 87K) isotherms were measured using a liquid nitrogen bath (77K) or liquid argon bath (87K) respectively, employing a Micromeritics ASAP 2020 system after the samples were degassed at 130 °C for 10 hours. Based on the N<sub>2</sub> sorption data at 77K, the average mesopore diameter is calculated from BJH method and the whole meso/macropore size distribution is calculated from DFT model in the Micromeritics ASAP 2020 software package.

The thermogravimetric analysis was performed on a Universal V3.9A TA Instruments from room temperature to 600°C with a heating rate of 10 °C/min under a flowing nitrogen.

### Calculation of H<sub>2</sub> adsorption enthalpy

The hydrogen adsorption isotherms of SNHKUST-1 at 77 and 87K were described and analyzed using the following virial-type<sup>1</sup> equation:

$$\ln p = \ln N + \frac{1}{T} \sum_{i=0}^m a_i N^i + \sum_{i=0}^n a_i N^i$$
$$\ln(P) = \ln(N) + (a_0 + a_1 * N + a_2 * N^2 + a_3 * N^3 + a_4 * N^4) / T + b_0 + b_1 * N + b_2 * N^2$$

where p is the pressure in mmHg, N is the amount adsorbed in mmol/g, T is the temperature in K, a<sub>i</sub> and b<sub>i</sub> are adjustable

parameters, and  $m$  and  $n$  represent the order of polynomials that required to adequately describe the isotherms. The coverage-dependent  $H_2$  adsorption enthalpy,  $Q_{st}$ , was calculated according to the following expression:

$$Q_{st}(N) = -R \sum_{i=1}^m a_i N^i$$
$$Q_{st} = -8.314 \cdot (a_0 + a_1 \cdot N + a_2 \cdot N^2 + a_3 \cdot N^3 + a_4 \cdot N^4) / 1000$$

where  $R$  is the universal gas constant.

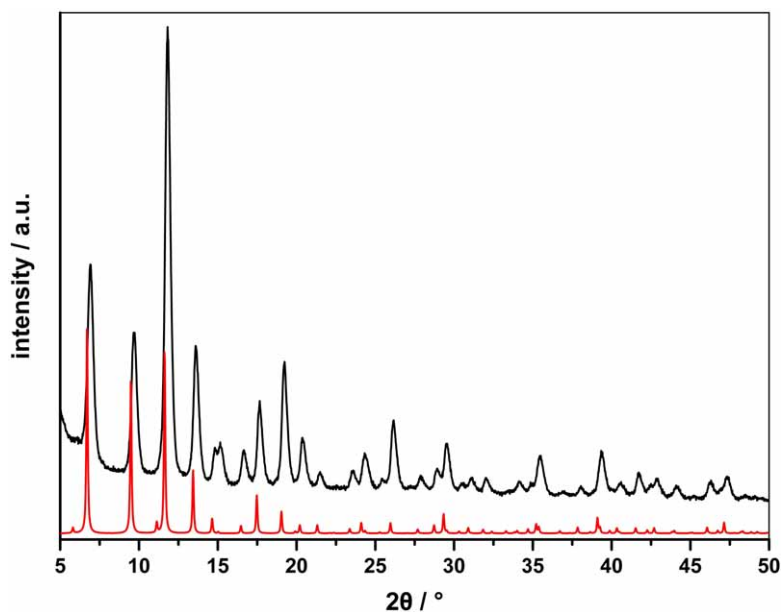

Fig. S1 The patterns of PXR D, as synthesized, black line and the simulated,<sup>2</sup> red line.

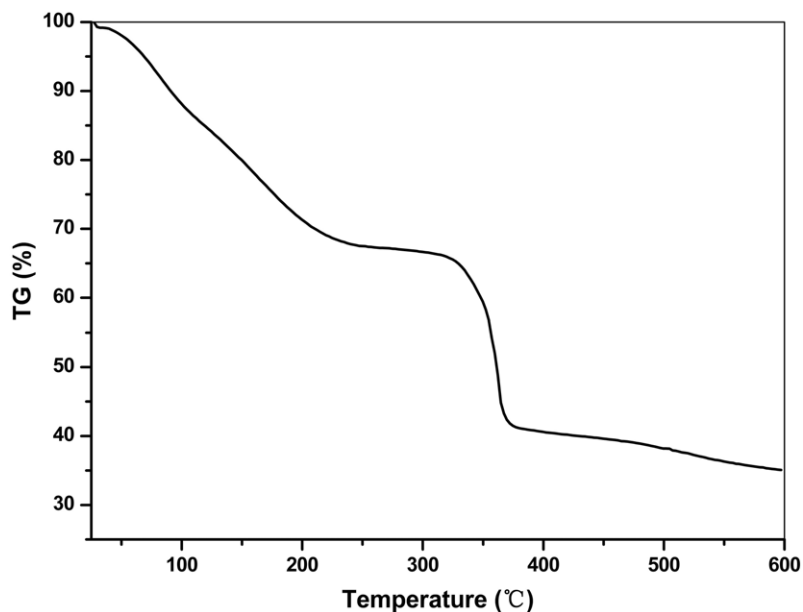

Fig. S2 TGA diagram for SNHKUST-1.

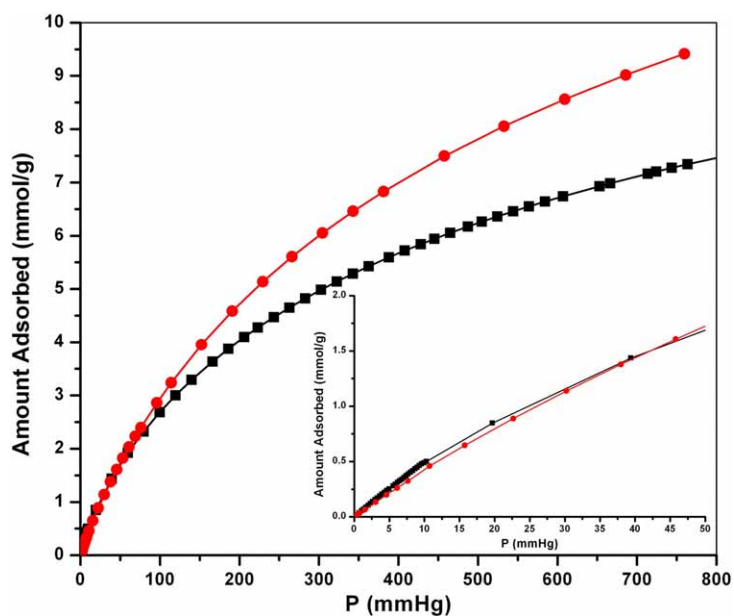

Fig. S3 A comparison of H<sub>2</sub> adsorption data from the literature and the result in this work at 87K, 0 < P < 1atm. Red circles , Rowsell et al.<sup>5</sup>; black squares, this work (SNHKUST-1).

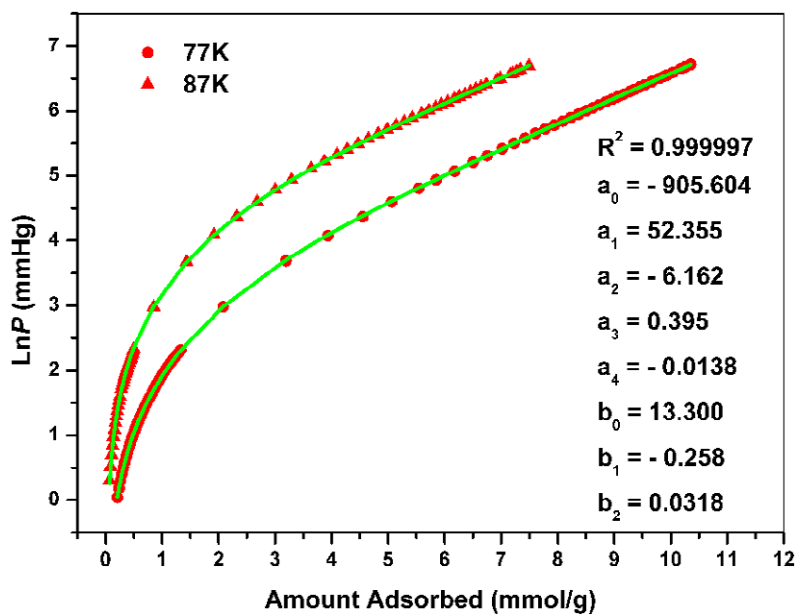

Fig. S4 The virial equation fits (lines) for SNHKUST-1.

Table S1 A comparison of BET surface area, pore volume and H<sub>2</sub> uptake for different HKUST-1 samples under 1atm at 77K.

| References | SSA <sub>BET</sub> (m <sup>2</sup> /g) | V <sub>p</sub> (cm <sup>3</sup> /g) | N <sub>H<sub>2</sub></sub> (mg/g) | H <sub>2</sub> wt% |
|------------|----------------------------------------|-------------------------------------|-----------------------------------|--------------------|
| 3          | 1239 (P/P <sub>0</sub> = 0.3)          | 0.62 (P/P <sub>0</sub> = 0.2)       | 21.6                              | 2.16               |
| 4          | 1944 (P/P <sub>0</sub> = 0.02-0.1)     |                                     |                                   |                    |
| 5          | 1507 (P/P <sub>0</sub> = 0.02-0.3)     | 0.75                                | 26.7                              | 2.67               |
| 6          | 1482 (P/P <sub>0</sub> = 0.1-0.3)      | 0.828 (P/P <sub>0</sub> = 0.995)    | 25.3                              |                    |
| SNHKUST-1  | 1444 (P/P <sub>0</sub> = 0.001-0.08)   | 1.288 (P/P <sub>0</sub> = 0.994)    | 20.2                              | 2.02               |

Table S2 N<sub>2</sub> Sorption Data for SNHKUST-1.

| P/P <sub>0</sub> | N (cm <sup>3</sup> /g) | P/P <sub>0</sub> | N (cm <sup>3</sup> /g) |
|------------------|------------------------|------------------|------------------------|
| 1.71445e-006     | 15.1658                | 0.993894         | 832.781                |
| 1.55421e-006     | 30.1918                | 0.984187         | 825.785                |
| 1.58134e-006     | 45.2277                | 0.979869         | 797.67                 |
| 1.66637e-006     | 60.2731                | 0.965939         | 617.211                |
| 1.79771e-006     | 75.3051                | 0.930669         | 477.841                |
| 1.99499e-006     | 90.3103                | 0.914747         | 460.43                 |
| 2.18253e-006     | 105.475                | 0.89156          | 446.702                |
| 2.5524e-006      | 120.639                | 0.866083         | 437.757                |
| 3.36722e-006     | 135.8                  | 0.839999         | 431.619                |
| 6.08698e-006     | 150.948                | 0.814399         | 427.248                |
| 1.49649e-005     | 166.05                 | 0.776522         | 422.158                |
| 2.9623e-005      | 181.081                | 0.726436         | 416.761                |
| 4.52586e-005     | 196.044                | 0.67629          | 412.384                |
| 5.78995e-005     | 210.958                | 0.626146         | 408.592                |
| 6.81655e-005     | 225.835                | 0.575435         | 404.997                |
| 7.86103e-005     | 240.671                | 0.525352         | 401.629                |
| 9.34104e-005     | 255.443                | 0.475254         | 398.3                  |
| 0.000124825      | 270.064                | 0.424737         | 395.037                |
| 0.000205215      | 284.267                | 0.37501          | 391.741                |
| 0.00036197       | 297.677                | 0.325005         | 388.212                |
| 0.000784113      | 308.428                | 0.274998         | 384.432                |
| 0.00304305       | 320.003                | 0.225109         | 380.172                |
| 0.00777453       | 327.518                | 0.150393         | 372.051                |
| 0.0138529        | 332.421                |                  |                        |
| 0.0310857        | 340.882                |                  |                        |
| 0.048365         | 347.428                |                  |                        |
| 0.0791198        | 357.45                 |                  |                        |
| 0.0954444        | 361.09                 |                  |                        |
| 0.118884         | 365.917                |                  |                        |
| 0.139055         | 369.168                |                  |                        |
| 0.158977         | 371.897                |                  |                        |
| 0.178912         | 374.29                 |                  |                        |
| 0.199075         | 376.547                |                  |                        |
| 0.249105         | 381.327                |                  |                        |
| 0.300839         | 385.653                |                  |                        |
| 0.354363         | 389.692                |                  |                        |
| 0.400273         | 392.886                |                  |                        |
| 0.450238         | 396.122                |                  |                        |
| 0.500247         | 399.314                |                  |                        |
| 0.550228         | 402.527                |                  |                        |
| 0.600242         | 405.815                |                  |                        |
| 0.650285         | 409.317                |                  |                        |
| 0.70029          | 413.195                |                  |                        |
| 0.750174         | 417.668                |                  |                        |
| 0.800135         | 423.144                |                  |                        |
| 0.820532         | 426.059                |                  |                        |
| 0.850495         | 430.823                |                  |                        |
| 0.875099         | 435.802                |                  |                        |
| 0.899961         | 442.7                  |                  |                        |
| 0.924824         | 452.676                |                  |                        |
| 0.948373         | 470.799                |                  |                        |
| 0.969586         | 515.013                |                  |                        |
| 0.976904         | 559.696                |                  |                        |
| 0.984326         | 706.174                |                  |                        |
| 0.993894         | 832.781                |                  |                        |

Table S3. H<sub>2</sub> adsorption Data for SNHKUST-1 at 77 and 87K.

| 77K        |            | 87K        |            |
|------------|------------|------------|------------|
| P (mmHg)   | N (mmol/g) | P (mmHg)   | N (mmol/g) |
| 0.065796   | 0.01187    | 0.078280   | 0.00088    |
| 0.195118   | 0.04029    | 0.401638   | 0.01879    |
| 0.327160   | 0.06824    | 0.720878   | 0.03606    |
| 0.462275   | 0.09590    | 1.045542   | 0.05362    |
| 0.604137   | 0.12414    | 1.356834   | 0.07026    |
| 0.759402   | 0.15423    | 1.681589   | 0.08742    |
| 0.900530   | 0.18090    | 2.007400   | 0.10451    |
| 1.042227   | 0.20745    | 2.332962   | 0.12135    |
| 1.204380   | 0.23687    | 2.659912   | 0.13813    |
| 1.350419   | 0.26267    | 2.987649   | 0.15488    |
| 1.497853   | 0.28827    | 3.313675   | 0.17123    |
| 1.647064   | 0.31362    | 3.640240   | 0.18751    |
| 1.798279   | 0.33880    | 3.969250   | 0.20378    |
| 1.950211   | 0.36369    | 4.298667   | 0.21992    |
| 2.104199   | 0.38843    | 4.627899   | 0.23585    |
| 2.260200   | 0.41304    | 4.957000   | 0.25173    |
| 2.416572   | 0.43733    | 5.539453   | 0.27873    |
| 2.575706   | 0.46151    | 5.859418   | 0.29375    |
| 2.735702   | 0.48537    | 6.164641   | 0.31045    |
| 2.896770   | 0.50910    | 6.482018   | 0.32513    |
| 3.059250   | 0.53264    | 6.807563   | 0.33875    |
| 3.222353   | 0.55624    | 7.099833   | 0.35607    |
| 3.387662   | 0.57946    | 7.407946   | 0.37188    |
| 3.578768   | 0.60593    | 7.726515   | 0.38659    |
| 3.770521   | 0.63215    | 8.039409   | 0.40172    |
| 3.965209   | 0.65821    | 8.352800   | 0.41730    |
| 4.144566   | 0.68210    | 8.668383   | 0.43284    |
| 4.353164   | 0.70921    | 9.001497   | 0.44629    |
| 4.527316   | 0.73172    | 9.309709   | 0.46229    |
| 4.728260   | 0.75708    | 9.621805   | 0.47687    |
| 4.929883   | 0.78222    | 9.971953   | 0.48679    |
| 5.311697   | 0.82982    | 10.301384  | 0.49947    |
| 5.525672   | 0.85536    | 19.691858  | 0.84774    |
| 5.754987   | 0.87886    | 39.415470  | 1.43475    |
| 5.816351   | 0.88638    | 59.768749  | 1.92039    |
| 6.047657   | 0.90952    | 79.567383  | 2.32187    |
| 6.257150   | 0.93514    | 99.727493  | 2.68234    |
| 6.491147   | 0.95848    | 119.716782 | 3.00070    |
| 6.709605   | 0.98346    | 139.707169 | 3.29110    |
| 6.941809   | 1.00696    | 166.129822 | 3.63684    |
| 7.017417   | 1.01251    | 186.047104 | 3.87489    |
| 7.250218   | 1.03616    | 205.970245 | 4.09687    |
| 7.478238   | 1.05977    | 223.161499 | 4.27482    |
| 7.545878   | 1.06677    | 243.199005 | 4.46928    |
| 7.767821   | 1.09119    | 262.890533 | 4.65099    |
| 7.996140   | 1.11438    | 282.876678 | 4.82342    |
| 8.213105   | 1.13904    | 302.722351 | 4.98544    |
| 8.440328   | 1.16312    | 322.642181 | 5.13962    |
| 8.670938   | 1.18637    | 342.706573 | 5.28645    |
| 8.902643   | 1.21063    | 362.548248 | 5.42539    |
| 9.115522   | 1.23595    | 387.970642 | 5.59464    |
| 9.191529   | 1.24178    | 407.867371 | 5.71940    |
| 9.421640   | 1.26451    | 428.034241 | 5.84039    |
| 9.654046   | 1.28693    | 445.283997 | 5.94076    |
| 9.897207   | 1.30828    | 465.035645 | 6.05225    |
| 10.136982  | 1.32996    | 487.550537 | 6.17242    |
| 19.811958  | 2.08414    | 504.845367 | 6.26253    |
| 40.054272  | 3.19184    | 524.572021 | 6.36056    |
| 58.971691  | 3.93540    | 544.314026 | 6.45607    |
| 78.932098  | 4.55026    | 564.194153 | 6.54930    |
| 99.442375  | 5.06486    | 584.528442 | 6.64068    |
| 122.548424 | 5.54600    | 607.022583 | 6.73757    |
| 139.495850 | 5.85067    | 653.058716 | 6.92788    |
| 159.750122 | 6.17569    | 666.428345 | 6.98418    |
| 182.796585 | 6.50117    | 713.714478 | 7.16259    |
| 202.677887 | 6.75430    | 724.112366 | 7.20250    |
| 225.391281 | 7.01633    | 743.746094 | 7.27297    |
| 245.244904 | 7.22767    | 763.433167 | 7.34065    |
| 265.372314 | 7.42460    | 809.044739 | 7.49193    |

|            |          |
|------------|----------|
| 285.453186 | 7.60711  |
| 305.387360 | 7.77638  |
| 324.961395 | 7.93587  |
| 345.202209 | 8.08881  |
| 364.876801 | 8.23220  |
| 385.195221 | 8.37077  |
| 404.791321 | 8.49877  |
| 424.889069 | 8.62307  |
| 444.635590 | 8.74153  |
| 464.846924 | 8.85612  |
| 484.494720 | 8.96338  |
| 504.101074 | 9.06646  |
| 524.626526 | 9.17214  |
| 544.773376 | 9.26969  |
| 564.018799 | 9.35930  |
| 583.994751 | 9.44947  |
| 603.454834 | 9.53462  |
| 634.766541 | 9.66577  |
| 669.298096 | 9.80169  |
| 694.572876 | 9.89952  |
| 703.339966 | 9.93293  |
| 733.978882 | 10.04220 |
| 770.456909 | 10.16855 |
| 794.794312 | 10.25110 |
| 828.003784 | 10.35606 |

## References

1. L. Czepirski, J. Jagiello, *Chem. Eng. Sci.* 1989, **44**, 797.
2. S. Chui, S. Lo, J. Charmant, A. Orpen and I. Williams, *Science*, 1999, **283**, 1148.
3. P. Krawiec, M. Kramer, M. Sabo, R. Kunschke, H. Fröde and S. Kaskel, *Adv. Eng. Mater.*, 2006, **8**, 293.
4. A. G. Wong-Foy, A. J. Matzger and O. M. Yaghi, *J. Am. Chem. Soc.*, 2006, **128**, 3494.
5. J. L. C. Rowsell and O. M. Yaghi, *J. Am. Chem. Soc.*, 2006, **128**, 1304.
6. J. Liu, J. T. Culp, S. Natesakhawat, B. C. Bockrath, B. Zande, S. G. Sankar, G. Garberoglio and J. K. Johnson, *J. Phys. Chem. C*, 2007, **111**, 9305.
